# Supplementary material for: A metal-free and transparent light-emitting device by sequential spray-coating fabrication of all layers including PEDOT:PSS for both electrodes
Source: Royal Society of Chemistry journal article supplement (doi:10.1039/d3ra02520a), 2023-01-01
Supplement: d3ra02520a1.pdf [file d3ra02520a1.pdf]

**Supplementary Information:**

**A metal-free and transparent light-emitting device by sequential spray-coating fabrication of all layers including PEDOT:PSS for both electrodes**

Etienne Auroux, Gunel Huseynova, Joan Ràfols-Ribé, Vladimir Miranda La Hera and Ludvig Edman\*

The Organic Photonics and Electronics Group, Department of Physics, Umeå University, SE-90187 Umeå, Sweden

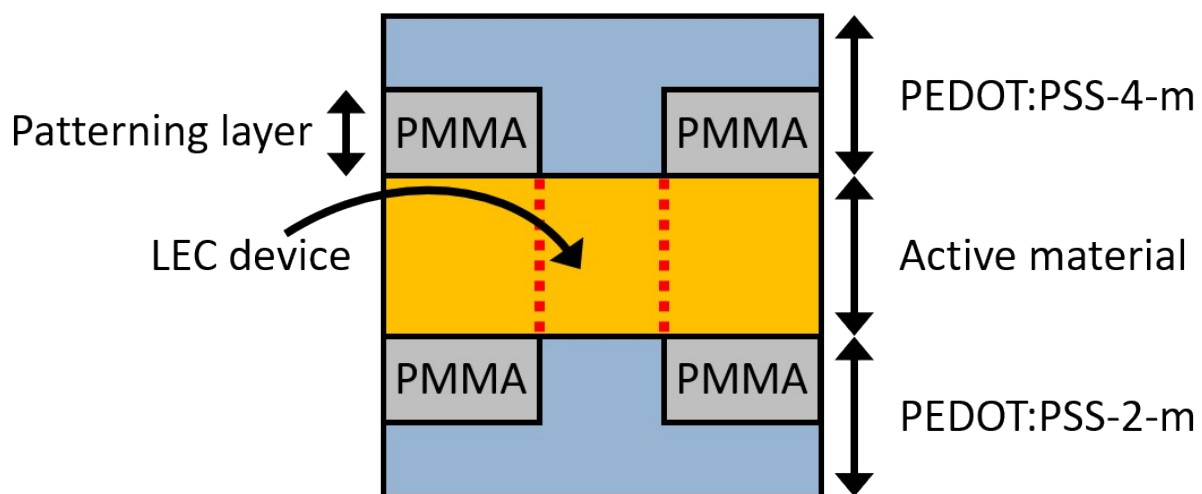

**Figure S1.** The device structure of the all-organic LEC.

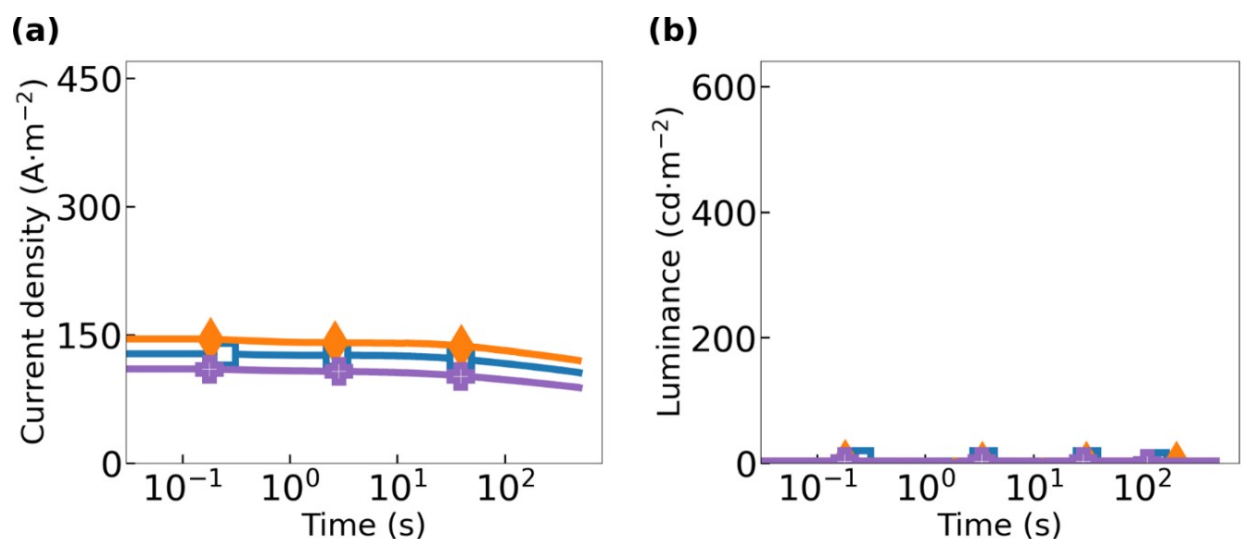

**Figure S2.** The temporal evolution of (a) the current density and (b) the luminance of three all-organic OLEDs featuring a 350 nm thick PEDOT:PSS-4-m cathode, a 300 nm thick SY active material, and a 170 nm thick PEDOT:PSS-2-m anode during 40 V constant voltage driving in “reverse bias”.

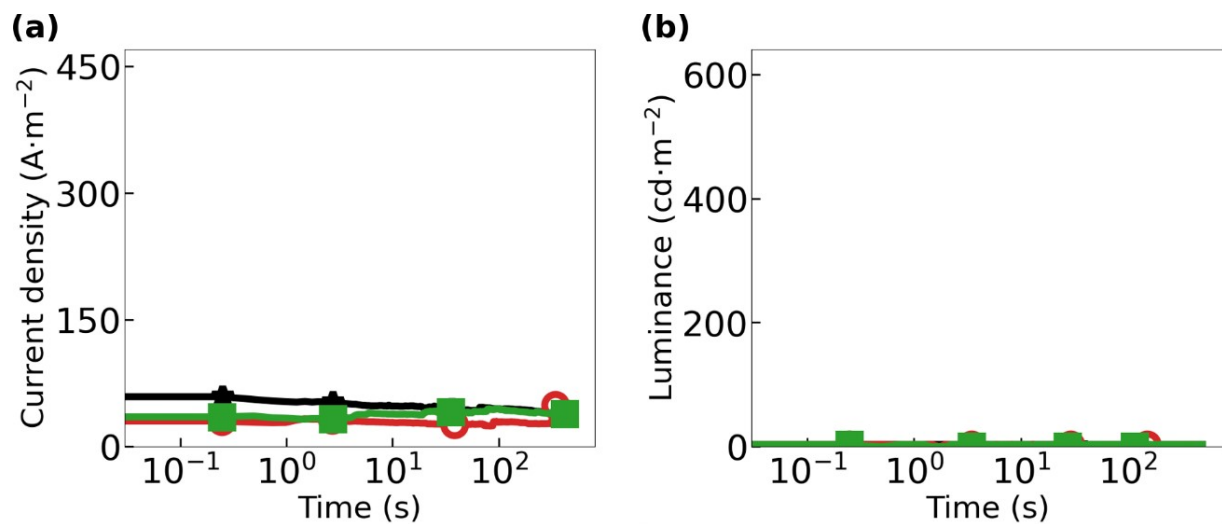

**Figure S3.** The temporal evolution of (a) the current density and (b) the luminance of three different all-organic OLEDs featuring a 170 nm thick PEDOT:PSS-2-m cathode, a 300 nm thick Super Yellow active material, and a 350 nm thick PEDOT:PSS-4-m anode during 40 V constant voltage driving in “forward bias”.

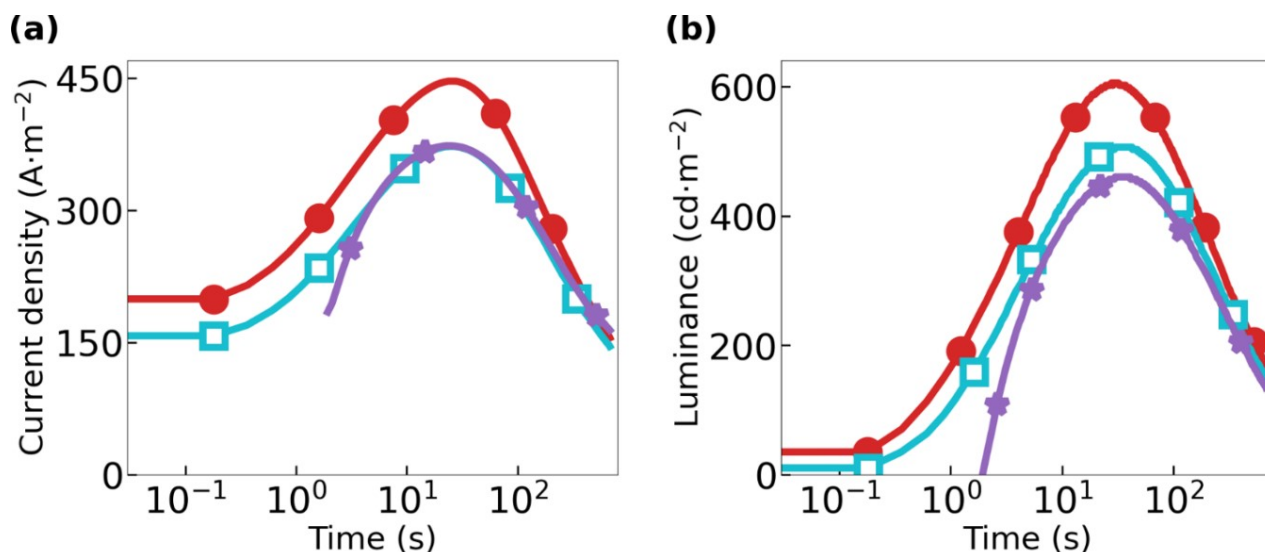

**Figure S4.** The temporal evolution of (a) the current density and (b) the luminance for three all-organic LECs driven by a “forward bias” of 40 V. The device features a 170 nm thick PEDOT:PSS-2-m cathode, a 300 nm thick THABF<sub>4</sub>:SY = 8 mass% active material, and a 350 nm thick PEDOT:PSS-4-m anode.

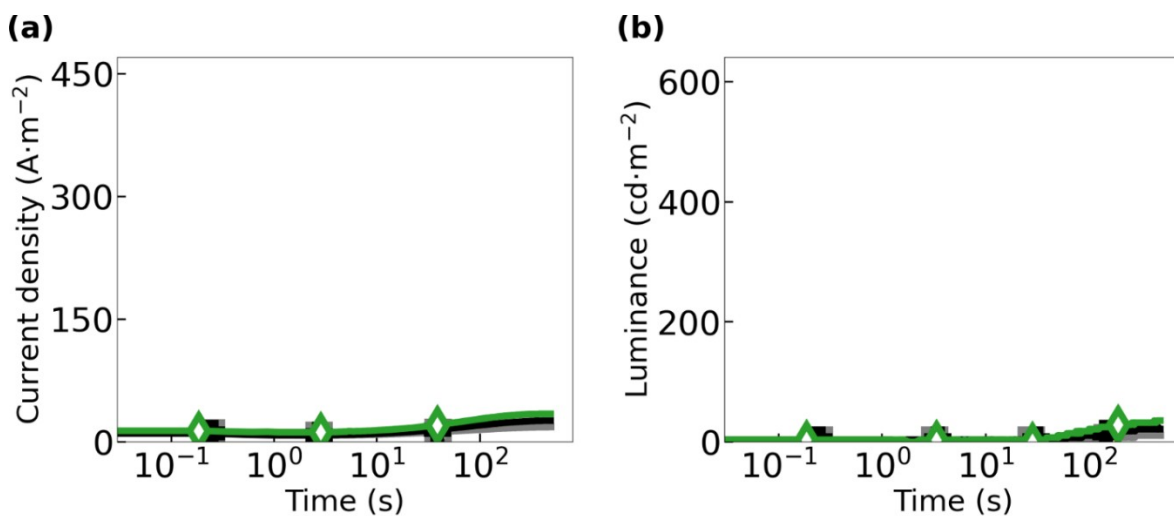

**Figure S5.** The temporal evolution of (a) the current density and (b) the luminance of the three all-organic LECs during driving in “reverse bias” of 40 V. The devices feature a 350 nm thick PEDOT:PSS-4-m cathode, a 300 nm thick THABF<sub>4</sub>:SY = 8 mass% active material, and a 170 nm thick PEDOT:PSS-2-m anode.
